# Supplementary material for: Numerical Simulation of Dispersed Particle-Blood Flow in the Stenosed Coronary Arteries
Source: Hindawi journal article supplement (doi:10.1155/2018/2593425), 2018-08-01
Supplement: f1 [file 2593425.f1.zip]

Archive with 2 entries (2 files):
- Abnormal (1).pdf
- Normal (1).pdf
