# Supplementary figures and images for: Numerical Simulation of Dispersed Particle-Blood Flow in the Stenosed Coronary Arteries
Source: Hindawi journal article supplement (doi:10.1155/2018/2593425), 2018-08-01

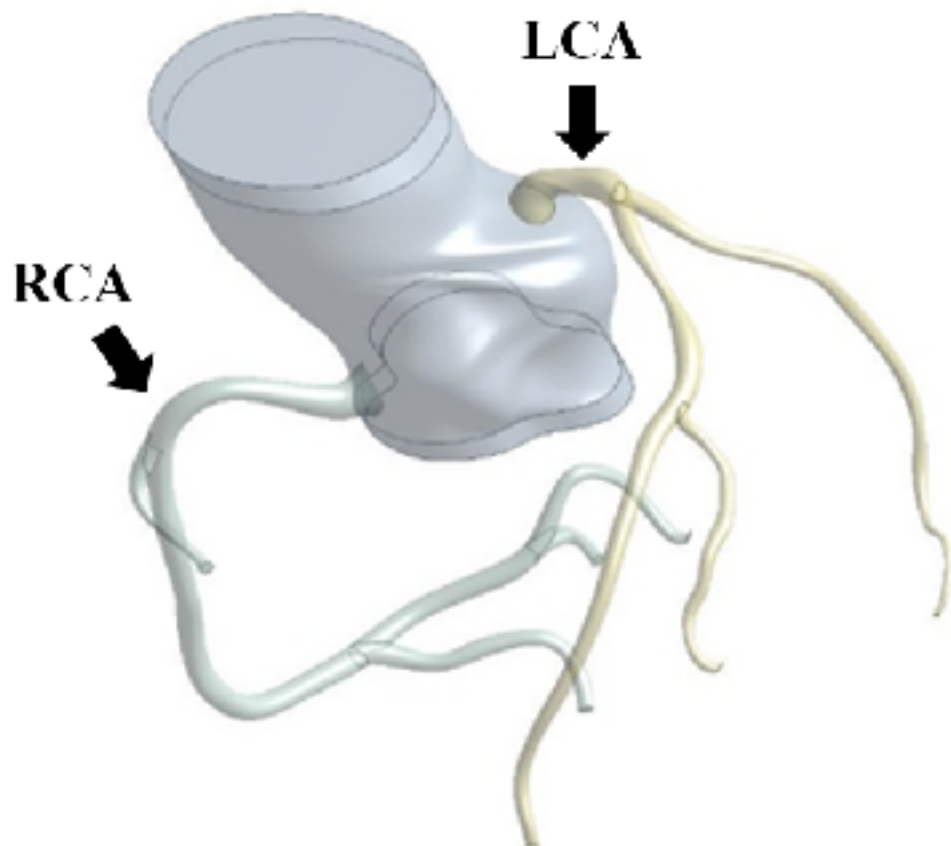

Supplement: f1 [file 2593425.f1.zip › Abnormal (1).pdf]

**RCA**

**LCA**

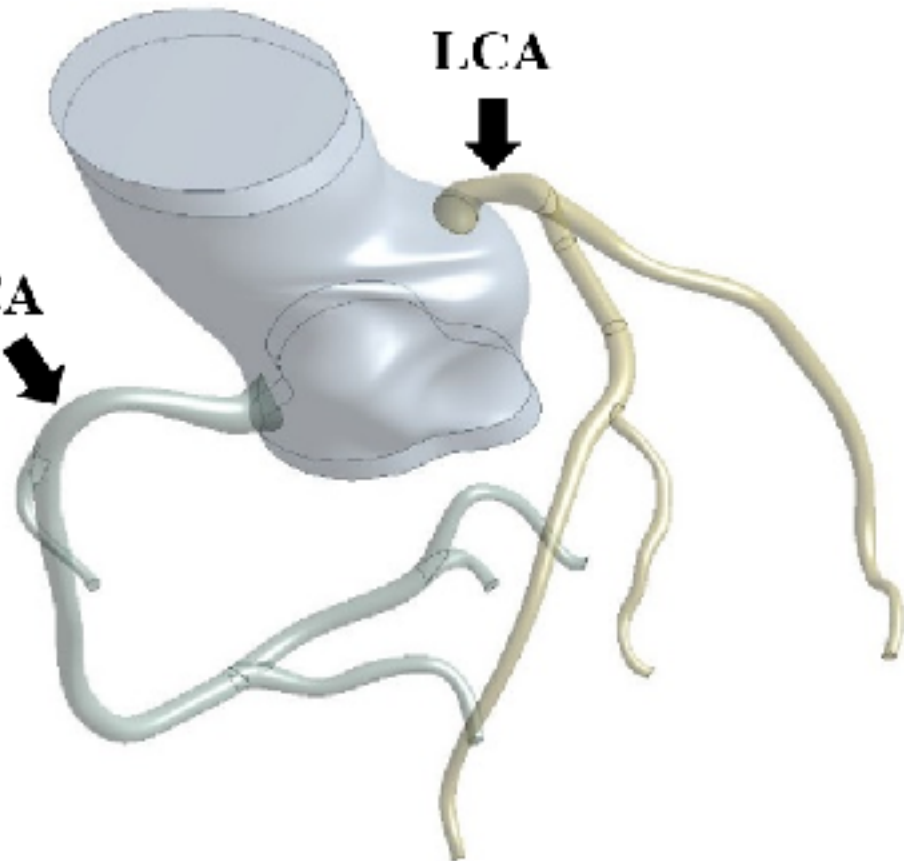

Supplement: f1 [file 2593425.f1.zip › Normal (1).pdf]
